# Supplementary material for: A Comparative Study of Benchtop and Portable NIR and Raman Spectroscopic Methods for the Quantitative Determination of Curcuminoids in Turmeric Powder
Source: MDPI journal article supplement (doi:10.3390/foods11152187), 2022-07-22
Supplement: s1 [file s1]

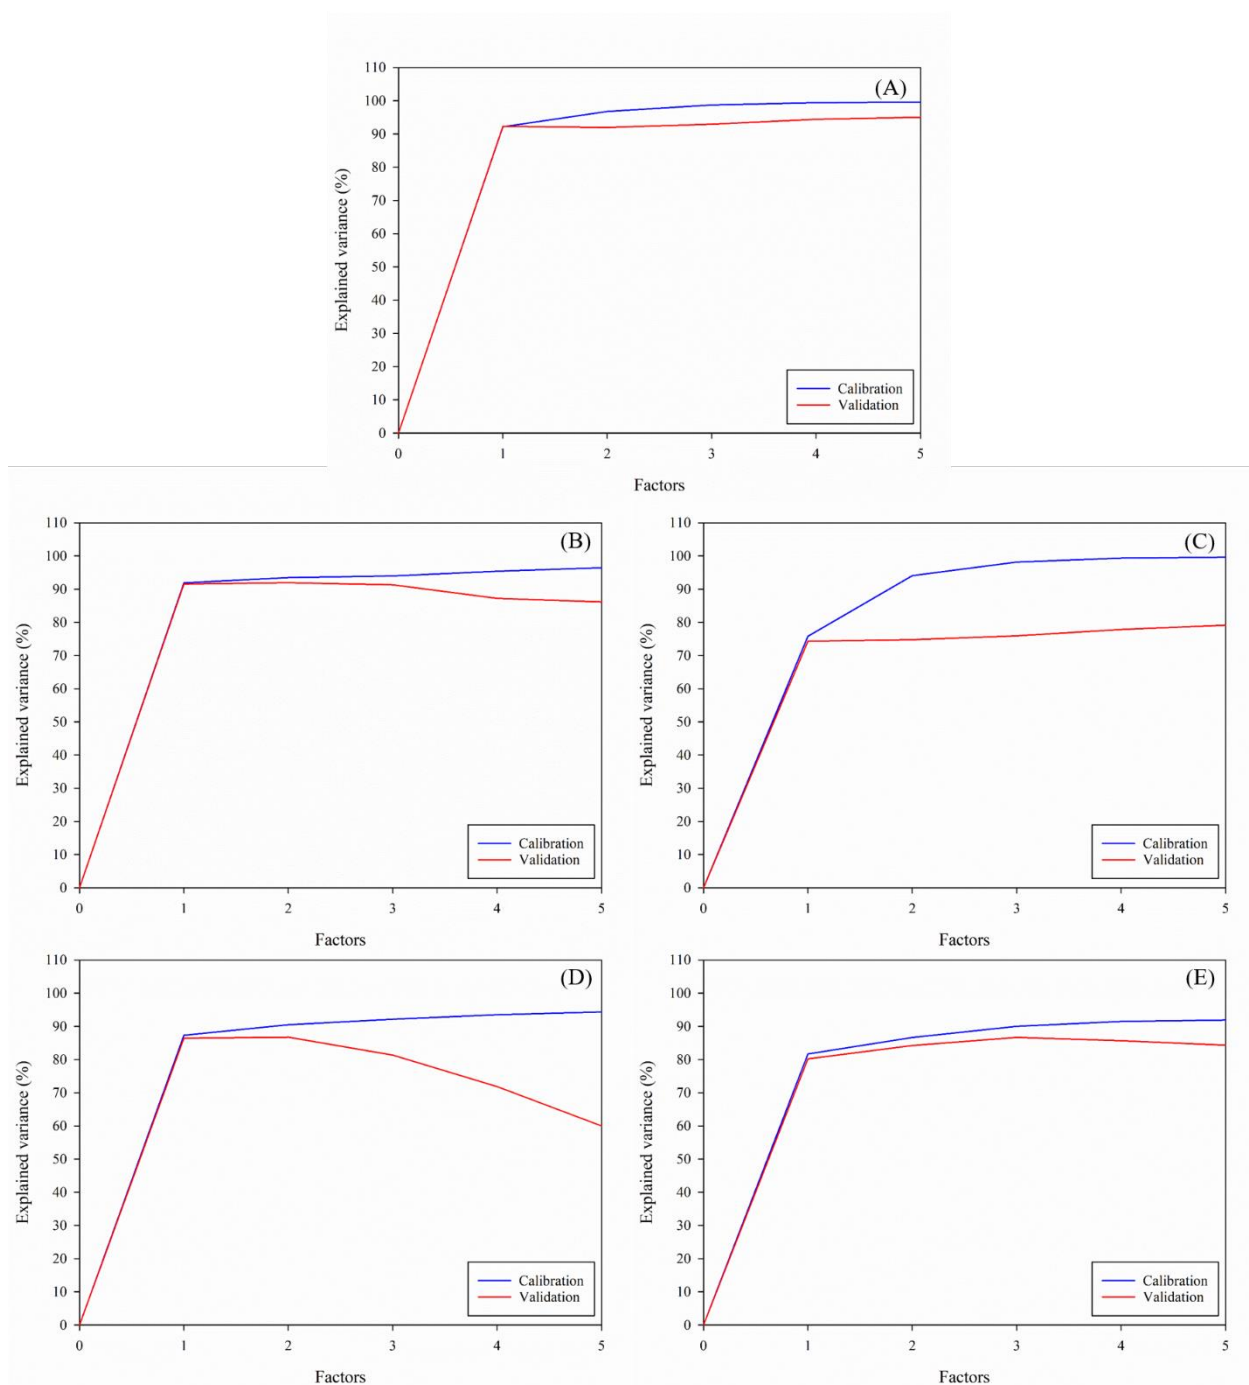

Figure S1. The calibration and prediction factor plots of the optimum PLSR models.

Table S1. Prediction results, LOD and LOQ of the optimum PLSR models

| Validation samples | Total curcuminoids concentration (% <i>w/w</i> ) |                |                |              |                |                                      |
|--------------------|--------------------------------------------------|----------------|----------------|--------------|----------------|--------------------------------------|
|                    | Benchtop NIR                                     | Benchtop FT-IR | Benchtop Raman | Portable NIR | Portable Raman | HPLC (Average $\pm$ SD, <i>n</i> =3) |
| T1                 | 7.056                                            | 7.467          | 6.526          | 7.130        | 7.355          | 6.972 $\pm$ 0.007                    |
| T2                 | 7.071                                            | 7.069          | 6.813          | 7.115        | 7.037          | 6.793 $\pm$ 0.002                    |
| T3                 | 9.021                                            | 8.821          | 8.718          | 9.098        | 9.011          | 9.374 $\pm$ 0.004                    |
| T4                 | 8.957                                            | 8.913          | 8.061          | 9.071        | 8.428          | 9.496 $\pm$ 0.001                    |
| T5                 | 10.008                                           | 9.639          | 9.695          | 10.159       | 10.388         | 9.787 $\pm$ 0.002                    |
| T6                 | 7.780                                            | 8.197          | 8.363          | 7.632        | 8.353          | 8.341 $\pm$ 0.004                    |
| T7                 | 7.773                                            | 7.953          | 10.159         | 7.620        | 7.889          | 8.084 $\pm$ 0.003                    |
| T8                 | 8.956                                            | 8.737          | 9.812          | 8.810        | 9.037          | 8.587 $\pm$ 0.003                    |
| T9                 | 8.959                                            | 8.587          | 9.075          | 8.807        | 9.475          | 8.845 $\pm$ 0.006                    |
| T10                | 10.450                                           | 9.726          | 9.820          | 10.350       | 10.281         | 10.163 $\pm$ 0.006                   |
| T11                | 10.231                                           | 9.955          | 10.066         | 10.128       | 9.616          | 9.315 $\pm$ 0.019                    |
| T12                | 10.303                                           | 10.527         | 10.479         | 10.162       | 9.989          | 10.027 $\pm$ 0.003                   |
| T13                | 10.269                                           | 10.575         | 10.539         | 10.180       | 10.321         | 10.759 $\pm$ 0.010                   |
| T14                | 11.337                                           | 11.279         | 10.939         | 11.057       | 11.724         | 11.316 $\pm$ 0.003                   |
| T15                | 11.110                                           | 10.970         | 10.356         | 10.858       | 11.427         | 11.253 $\pm$ 0.001                   |
| LOD*               | 1.401                                            | 1.358          | 3.541          | 1.518        | 1.609          | -                                    |
| LOQ*               | 4.377                                            | 4.114          | 10.731         | 4.600        | 4.876          | -                                    |

\* LOD =  $(3.3 * \sigma)/S$  and LOQ =  $(10 * \sigma)/S$ , where  $\sigma$  is standard error of the plots between HPLC and PLSR determinations and S is the slope of the plot between HPLC and PLSR determinations
